# Supplementary material for: Chemical state and isotope ratio analysis of individual uranium particles by a combination of micro-Raman spectroscopy and secondary ion mass spectrometry
Source: Royal Society of Chemistry journal article supplement (doi:10.1039/c7ay01815k), 2017-01-01
Supplement: c7ay01815k1.pdf [file c7ay01815k1.pdf]

**Electronic supplementary information**

For

**Chemical state and isotope ratio analysis of individual uranium  
particles by a combination of micro-Raman spectroscopy and  
secondary ion mass spectrometry**

Takumi Yomogida\*, Fumitaka Esaka, and Masaaki Magara

Research Group for Safeguards Analytical Chemistry, Japan Atomic Energy Agency

2-4 Shirakata, Tokai, Naka, Ibaraki 319-1195, Japan

\*Corresponding author. Tel.: +81-29-284-3667, Fax.: +81-29-282-6950.

E-mail address: yomogida.takumi@jaea.go.jp (T.Yomogida).

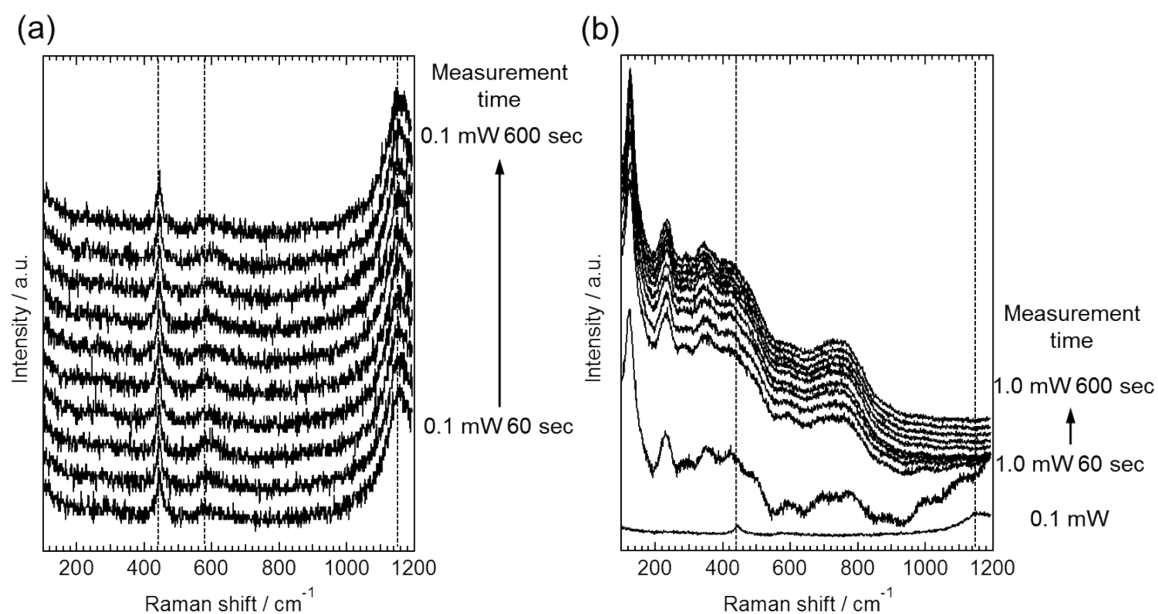

Figure S1. Changes in the MRS spectrum of a  $\text{UO}_2$  particle with a diameter of  $3\ \mu\text{m}$  with measurement time. The laser powers of (a)  $0.1\ \text{mW}$  and (b)  $1.0\ \text{mW}$  were used for the measurement.

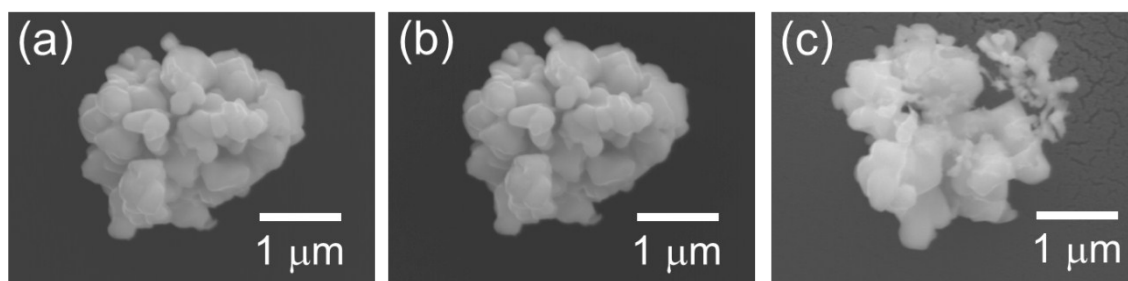

Figure S2. The scanning electron images of a uranium particle ( $\text{UO}_2$ ) with a diameter of  $3\ \mu\text{m}$  (a) before and after MRS measurements with the laser powers of (b)  $0.1\ \text{mW}$  and (c)  $1.0\ \text{mW}$ .

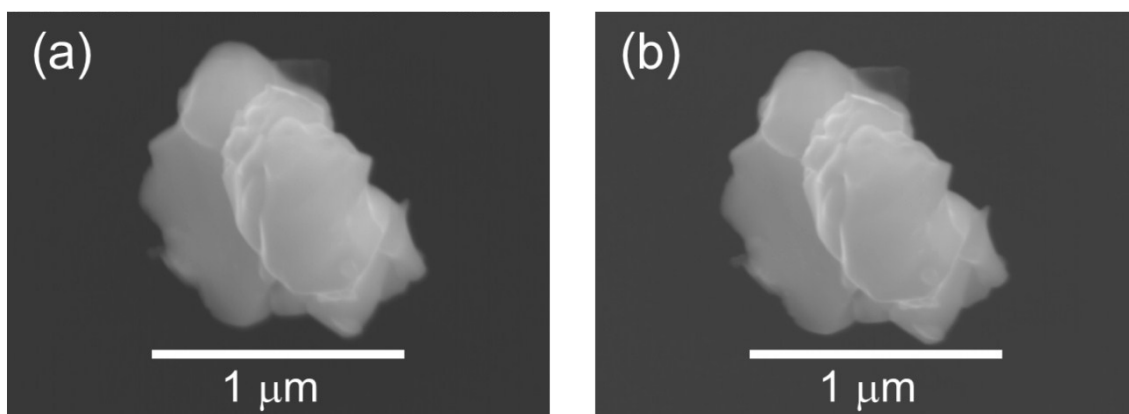

24

25 Figure S3. Scanning electron images of a uranium particle (UO<sub>2</sub>) with a diameter of 1 mm

26 (a) before and (b) after MRS measurement with a 0.1 mW laser power.

27

28 Table. S1 Particle sizes and  $^{234}\text{U}/^{238}\text{U}$  and  $^{235}\text{U}/^{238}\text{U}$  isotope ratios of individual particles in a  
 29 uranium dioxide sample with natural composition. The errors represent the expanded  
 30 uncertainties with a coverage factor of  $k = 2$ .

| Particle No.               | Size ( $\mu\text{m}$ ) | $^{234}\text{U}/^{238}\text{U}$ isotope ratio / $\times 10^{-5}$ | $^{235}\text{U}/^{238}\text{U}$ isotope ratio/ $\times 10^{-3}$ |
|----------------------------|------------------------|------------------------------------------------------------------|-----------------------------------------------------------------|
| 1                          | 5.1                    | $5.1 \pm 0.4$                                                    | $7.32 \pm 0.07$                                                 |
| 2                          | 4.1                    | $5.1 \pm 0.4$                                                    | $7.23 \pm 0.06$                                                 |
| 3                          | 3.4                    | $5.1 \pm 0.2$                                                    | $7.19 \pm 0.05$                                                 |
| 4                          | 1.9                    | $5.1 \pm 0.4$                                                    | $7.24 \pm 0.07$                                                 |
| 5                          | 2.2                    | $5.5 \pm 0.3$                                                    | $7.21 \pm 0.06$                                                 |
| 6                          | 3.9                    | $4.9 \pm 0.4$                                                    | $7.24 \pm 0.05$                                                 |
| 7                          | 3.0                    | $5.4 \pm 0.5$                                                    | $7.30 \pm 0.07$                                                 |
| 8                          | 4.2                    | $5.7 \pm 0.4$                                                    | $7.24 \pm 0.04$                                                 |
| 9                          | 1.1                    | $5.4 \pm 0.5$                                                    | $7.18 \pm 0.07$                                                 |
| 10                         | 4.1                    | $5.2 \pm 0.3$                                                    | $7.25 \pm 0.07$                                                 |
| Average                    | -                      | $5.2 \pm 0.5$                                                    | $7.24 \pm 0.09$                                                 |
| Literature <sup>[*1]</sup> | -                      | $5.5 \pm 1.0$                                                    | $7.25 \pm 0.02$                                                 |

31 <sup>\*1</sup>P. De Bièvre, P.D.P. Taylor, *Int. J. Mass Spectrom. Ion Processes* **1993**, 123, 149–166.

32
